# Supplementary material
Source: PubMed Central journal article supplement (PMC6211806)
Supplement: NIHMS1504373-supplement-1.pdf [file NIHMS1504373-supplement-1.pdf]

Supplemental Table 1

*Measures Used Across Time Points*

| Instrument                                                                    | Young     |           | Score Interpretation |
|-------------------------------------------------------------------------------|-----------|-----------|----------------------|
|                                                                               | Childhood | Adulthood |                      |
| Wechsler Intelligence Scale for Children – 3 <sup>rd</sup> edition (WISC-III) | *         |           | High                 |
| Wisconsin Card Sorting Test (WCST)                                            | *         |           | High                 |
| Gordon Diagnostic System                                                      | *         |           | High                 |
| Stroop Color-Word Test                                                        | *         |           | High                 |
| Visual Span Test                                                              | *         |           | High                 |
| California Verbal Learning Test-Children’s version (CVLT-C)                   | *         |           | High                 |
| Tower of London                                                               | *         |           | Low                  |
| Behavior Rating Inventory of Executive Functioning (BRIEF)                    | *         | *         | Low                  |
| Vineland Adaptive Behavior Scales- 2 <sup>nd</sup> edition (VABS-II)          | *         | *         | High                 |
| Wechsler Adult Intelligence Scale – 3 <sup>rd</sup> edition (WAIS-III)        |           | *         | High                 |
| Social Adjustment Scale – Self-report (SAS-SR)                                |           | *         | High                 |
| Trait Emotional Intelligence Questionnaire – Short Form                       |           | *         | High                 |
| Structured Interview for Prodromal Symptoms (SIPS)                            |           | *         | Low                  |
| Adult Self-Report (ASR)                                                       |           | *         | Low                  |

*Note.* Score Interpretation: High = High scores represent better performance; Low = Low scores represent better performance.

## Supplemental Table 2

*Negative Binomial Regression Predicting Young Adult SIPS - Positive Symptoms of Psychosis from Childhood Executive Functioning in Individuals with 22q11DS*

|                   | Model 1                  | Model 2                 |
|-------------------|--------------------------|-------------------------|
| Time 1 Predictors | B (SE)                   | B (SE)                  |
| Factor 1          | .057 (.637)              | -.835 (.447)            |
| Factor 2          | .334 (.843)              | <b>-1.174 (.497) *</b>  |
| Factor 3          | 1.386 (.730)             | .674 (.431)             |
| Factor 4          | .632 (.632)              | -.115 (.388)            |
| Factor 5          | <b>2.018 (.835) *</b>    | <b>2.639 (.636) ***</b> |
| Factor 6          | <b>-3.409 (1.190) **</b> | <b>-1.323 (.489) **</b> |
| Vineland          | .011 (.036)              | <b>.062 (.030) *</b>    |
| FSIQ              |                          | -.046 (.026)            |

*Note:* Model 1 does not contain childhood IQ as a covariate. Model 2 contains childhood IQ as a covariate.

\*  $p < .05$ ; \*\*  $p < .01$ ; \*\*\*  $p < .001$ .

Supplemental Table 3

Regression Predicting Young Adult ASR Externalizing Problems from Childhood Executive Functioning in Individuals with 22q11DS

|                   | Model 1                   | Model 2                |
|-------------------|---------------------------|------------------------|
| Time 1 Predictors | B (SE)                    | B (SE)                 |
| Factor 1          | -3.299 (2.116)            | 1.759 (1.919)          |
| Factor 2          | <b>-7.415 (2.696) *</b>   | -.732 (1.905)          |
| Factor 3          | -1.164 (1.919)            | -.928 (1.374)          |
| Factor 4          | .510 (2.852)              | -1.229 (2.193)         |
| Factor 5          | <b>12.607 (2.925) ***</b> | <b>5.719 (2.265) *</b> |
| Factor 6          | -.622 (2.277)             | -2.553 (1.710)         |
| Vineland          | <b>.476 (.137) **</b>     | .209 (.110)            |
| FSIQ              |                           | -.062 (.152)           |

Note: Model 1 does not contain childhood IQ as a covariate. Model 2 contains childhood IQ as a covariate.

\*  $p < .05$ ; \*\*  $p < .01$ ; \*\*\*  $p < .001$ .

## Supplemental Table 4

*Regression Predicting Young Adult ASR ADHD Problems from Childhood Executive Functioning in Individuals with 22q11DS*

|                   | Model 1                  | Model 2                |
|-------------------|--------------------------|------------------------|
| Time 1 Predictors | B (SE)                   | B (SE)                 |
| Factor 2          | <b>-4.557 (1.599) **</b> | -1.522 (1.509)         |
| Factor 5          | <b>6.454 (1.978) **</b>  | <b>4.999 (1.934) *</b> |
| Factor 6          | -.984 (2.059)            | -3.063 (1.751)         |
| Vineland          | <b>.223 (.104) *</b>     | .153 (.108)            |
| FSIQ              |                          | .052 (.112)            |

*Note:* Model 1 does not contain childhood IQ as a covariate. Model 2 contains childhood IQ as a covariate.

\*  $p < .05$ ; \*\*  $p < .01$ .

Supplemental Table 5

*Regression Predicting Young Adult VABS-II Adaptive Functioning from Childhood Executive Functioning in Individuals with 22q11DS*

|                   | Model 1                  | Model 2                  |
|-------------------|--------------------------|--------------------------|
| Time 1 Predictors | B (SE)                   | B (SE)                   |
| Factor 1          | 1.672 (1.521)            | -.438 (2.360)            |
| Factor 2          | 2.926 (1.937)            | .450 (2.292)             |
| Factor 3          | -1.405 (1.379)           | -2.174 (1.728)           |
| Factor 4          | 1.578 (2.049)            | 3.319 (2.773)            |
| Factor 5          | <b>-7.787 (2.102) **</b> | <b>-7.741 (2.859) **</b> |
| Factor 6          | -1.578 (1.636)           | -.166 (2.135)            |
| Vineland          | .152 (.098)              | .141 (.140)              |
| FSIQ              |                          | .313 (.191)              |

*Note:* Model 1 does not contain childhood IQ as a covariate. Model 2 contains childhood IQ as a covariate.

\*\*  $p < .01$ .

## Supplemental Table 6

*Regression Predicting Young Adult SAS-SR Social Adjustment from Childhood Executive Functioning in Individuals with 22q11DS*

|                   | Model 1                 | Model 2                |
|-------------------|-------------------------|------------------------|
| Time 1 Predictors | B (SE)                  | B (SE)                 |
| Factor 2          | -2.208 (2.329)          | 1.360 (1.541)          |
| Factor 5          | <b>9.396 (3.087) **</b> | <b>5.509 (2.092) *</b> |
| Factor 6          | 1.203 (2.912)           | -.759 (1.747)          |
| Vineland          | .072 (.129)             | .076 (.107)            |
| FSIQ              |                         | -.103 (.121)           |

*Note:* Model 1 does not contain childhood IQ as a covariate. Model 2 contains childhood IQ as a covariate.

\*  $p < .05$ ; \*\*  $p < .01$ .

Supplemental Table 7

*Regression Predicting Young Adult TEIQue-SF Emotional Intelligence from Childhood Executive Functioning in Individuals with 22q11DS*

|                   | Model 1               | Model 2               |
|-------------------|-----------------------|-----------------------|
| Time 1 Predictors | B (SE)                | B (SE)                |
| Factor 1          | .016 (.129)           | -.096 (.116)          |
| Factor 2          | .264 (.162)           | .042 (.108)           |
| Factor 3          | .175 (.113)           | <b>.206 (.076) *</b>  |
| Factor 4          | <b>.574 (.173) **</b> | .130 (.132)           |
| Factor 5          | <b>-.399 (.180) *</b> | <b>-.288 (.131) *</b> |
| Factor 6          | -.040 (.132)          | .001 (.098)           |
| Vineland          | -.002 (.009)          | -.001 (.007)          |
| FSIQ              |                       | .002 (.010)           |

*Note:* Model 1 does not contain childhood IQ as a covariate. Model 2 contains childhood IQ as a covariate.

\*  $p < .05$ ; \*\*  $p < .01$ .
